# Supplementary material
Source: PubMed Central journal article supplement (PMC6421625)

**Supplementary Table 1.** Performance of hypothalamus tissue gene expression prediction models built using GTEx data.

| Prediction performance (R <sup>2</sup> ) | All   | Protein | lncRNAs | miRNAs | Others <sup>a</sup> |
|------------------------------------------|-------|---------|---------|--------|---------------------|
| 0.01                                     | 7584  | 5518    | 1896    | 45     | 125                 |
| 0.04                                     | 4666  | 3365    | 1195    | 22     | 84                  |
| 0.09                                     | 2497  | 1748    | 685     | 10     | 54                  |
| 0.16                                     | 1187  | 808     | 347     | 6      | 26                  |
| ≥ 0                                      | 10807 | 7953    | 2621    | 67     | 166                 |

Abbreviations: *Protein*, protein coding genes; *lncRNAs*, long non-coding RNAs; *miRNAs*, microRNAs.

<sup>a</sup> Including processed transcripts, immunoglobulin genes, and T cell receptor genes.

**Supplementary Table 2.** Performance of ovary tissue gene expression prediction models built using GTEx data.

| Prediction performance (R <sup>2</sup> ) | All    | Protein | lncRNAs | miRNAs | Others <sup>a</sup> |
|------------------------------------------|--------|---------|---------|--------|---------------------|
| 0.01                                     | 8580   | 5969    | 2331    | 96     | 184                 |
| 0.04                                     | 5521   | 3869    | 1492    | 50     | 110                 |
| 0.09                                     | 3049   | 2138    | 827     | 20     | 64                  |
| 0.16                                     | 1480   | 1035    | 403     | 8      | 34                  |
| ≥ 0                                      | 11,921 | 8,302   | 3,226   | 139    | 254                 |

Abbreviations: *Protein*, protein coding genes; *lncRNAs*, long non-coding RNAs; *miRNAs*, microRNAs.

<sup>a</sup> Including processed transcripts, immunoglobulin genes, and T cell receptor genes.

**Supplementary Table 3.** Functional pathway analysis and relevant functions for TWAS-identified genes associated with age at natural menopause.

| Top diseases and functions in networks                                      | Molecules in network                                                                                                                                                                                                              | ANM-associated molecules                                              | Score <sup>a</sup>   |
|-----------------------------------------------------------------------------|-----------------------------------------------------------------------------------------------------------------------------------------------------------------------------------------------------------------------------------|-----------------------------------------------------------------------|----------------------|
| Embryonic Development, Organ Development, Organismal Development            | BAG6, CBY1, CCNB1, CEBPA, CKAP2, CSNK2B, CTNNB1, CYP2B6, DPEP1, EPHB3, EPHX1, FDFT1, FGFR4, FOXO1, FXR2, GLIPR1, HMGCS1, LSS, MGEA5, NAA10, NOTCH4, NUSAP1, PFKM, PRIM1, RAB5C, RAD23A, RELA, SEMA3C, SNRK, TCF19, TP53, TPD52L1, | BAG6, CBY1, CSNK2B, EPHX1, FGFR4, NOTCH4, NUSAP1, PRIM1, RAB5C, TCF19 | 23                   |
| Inflammatory Disease, Neurological Disease, Skeletal and Muscular Disorders | P-TEFb, PRRC2A                                                                                                                                                                                                                    | PRRC2A                                                                | 3                    |
| Developmental Disorder, Hereditary Disorder, Metabolic Disease              | NUPR1, SUOX                                                                                                                                                                                                                       | SUOX                                                                  | 3                    |
| Cancer, Cell Cycle, Cellular Development                                    | GPRIN1, MITF                                                                                                                                                                                                                      | GPRIN1                                                                | 3                    |
| Cancer, Cell Death and Survival, Cellular Assembly and Organization         | ILF3, NR3C1, ZNF346                                                                                                                                                                                                               | ZNF346                                                                | 3                    |
|                                                                             |                                                                                                                                                                                                                                   | <i>P</i> value                                                        | overlapped genes (%) |
| Top canonical pathways                                                      | Sulfite oxidation IV                                                                                                                                                                                                              | 1.24E-03                                                              | 1/1 (100)            |
|                                                                             | Clathrin-mediated endocytosis signaling                                                                                                                                                                                           | 1.77E-03                                                              | 3/196 (1.5)          |
|                                                                             | IL-2 signaling                                                                                                                                                                                                                    | 2.83E-03                                                              | 2/64 (3.1)           |
|                                                                             | EGF signaling                                                                                                                                                                                                                     | 3.19E-03                                                              | 2/68 (2.9)           |
|                                                                             | PI3K/AKT signaling in the pathogenesis of influenza                                                                                                                                                                               | 3.66E-03                                                              | 2/73 (2.7)           |
|                                                                             |                                                                                                                                                                                                                                   | <i>P</i> value                                                        | # molecules          |
| Diseases and disorders                                                      | Infectious disease                                                                                                                                                                                                                | 3.04E-02 - 2.76E-04                                                   | 5                    |
|                                                                             | Endocrine system disease                                                                                                                                                                                                          | 3.17E-02 - 3.33E-04                                                   | 8                    |
|                                                                             | Gastrointestinal disease                                                                                                                                                                                                          | 4.49E-02 - 3.33E-04                                                   | 21                   |
|                                                                             | Immunological disease                                                                                                                                                                                                             | 4.84E-02 - 3.33E-04                                                   | 8                    |
|                                                                             | Inflammatory disease                                                                                                                                                                                                              | 4.49E-02 - 3.33E-04                                                   | 6                    |
|                                                                             |                                                                                                                                                                                                                                   | <i>P</i> value                                                        | # molecules          |
| Molecular and cellular functions                                            | Cellular compromise                                                                                                                                                                                                               | 1.24E-03 - 1.24E-03                                                   | 1                    |
|                                                                             | Lipid metabolism                                                                                                                                                                                                                  | 1.96E-02 - 1.24E-03                                                   | 4                    |
|                                                                             | Small molecule biochemistry                                                                                                                                                                                                       | 1.96E-02 - 1.24E-03                                                   | 4                    |
|                                                                             | Cellular growth and proliferation                                                                                                                                                                                                 | 4.84E-02 - 2.48E-03                                                   | 2                    |
|                                                                             | cell cycle                                                                                                                                                                                                                        | 1.72E-02 - 3.71E-03                                                   | 2                    |

<sup>a</sup> The score is the negative Log of the *P* value for network association testing.

Supplementary Figure 1.

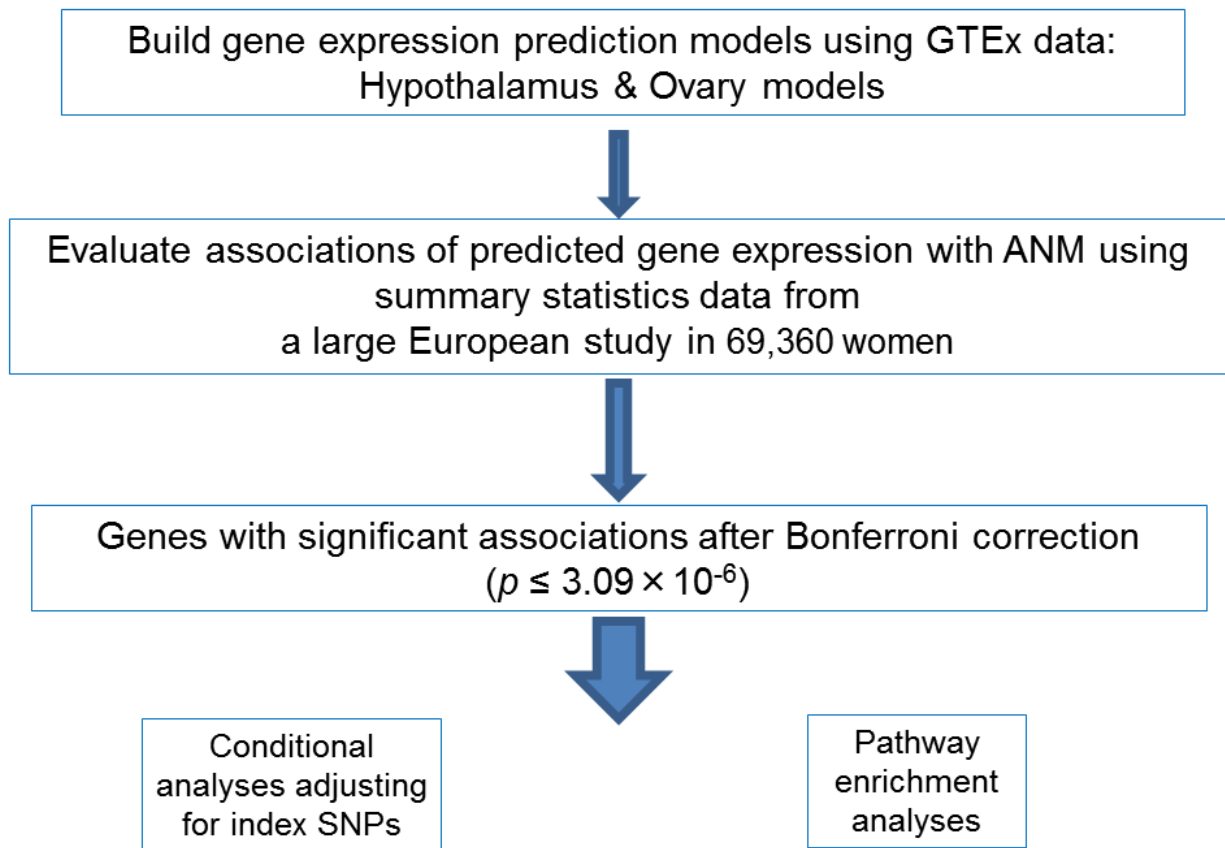

Supplement: 776788_Supplementary_figure_and_Tables.pdf [file 776788_Supplementary_figure_and_Tables.pdf]
